# Supplementary material
Source: PubMed Central journal article supplement (PMC3308178)
Supplement: supp_dev.072256_DEV072256TableS1.pdf [file supp_dev.072256_DEV072256TableS1.pdf]

**Table S1. Genes that are differentially expressed in *Nkx2.9*-deficient mouse embryos**

| <b>Fold change</b> | <b>Regulation</b> | <b>Gene description</b>                                                         | <b>GenBank</b> |
|--------------------|-------------------|---------------------------------------------------------------------------------|----------------|
| 10.5               | Up                | inactive X specific transcripts                                                 | BC051222       |
| 4.6                | Down              | eukaryotic translation initiation factor 2, subunit 3, structural gene Y-linked | BC043656       |
| 4.3                | Down              | jumonji, AT rich interactive domain 1D (Rbp2 like)                              | AF127244       |
| 3.7                | Down              | DEAD (Asp-Glu-Ala-Asp) box polypeptide 3, Y-linked                              | BC021453       |
| 3.6                | Down              | ubiquitously transcribed tetratricopeptide repeat gene, Y chromosome            | AF057367       |
| 2.9                | Down              | homeo box C8                                                                    | X07646         |
| 2.9                | Down              | RIKEN cDNA 4922502B01 gene                                                      | AK013705       |
| 2.4                | Down              | homeo box C6                                                                    | X16511         |
| 2.4                | Down              | calbindin-28K                                                                   | M21531         |
| 2.3                | Down              | homeo box D8                                                                    | NM_008276.2    |
| 2.2                | Down              | neuromedin S                                                                    | AB164466       |
| 2.1                | Up                | forkhead box D1                                                                 | L38607         |
| 2.0                | Down              | otoraplin                                                                       | AJ243939       |
| 2.0                | Down              | diacylglycerol kinase kappa                                                     | BC075627       |
| 2.0                | Down              | homeo box B9                                                                    | BC100743       |
| 1.9                | Down              | carbonic anhydrase 10                                                           | AB080741       |
| 1.9                | Down              | V-set and transmembrane domain containing 2A                                    | BC027127       |
| 1.9                | Up                | Tex17                                                                           | AF285579       |
| 1.9                | Down              | Riken cDNA C130021I20 gene                                                      | AK147796       |
| 1.9                | Down              | homeo box A6                                                                    | BC119105       |
| 1.9                | Down              | protein tyrosine phosphatase, non-receptor type 3                               | NM_011207.2    |
| 1.9                | Down              | MACRO domain containing 2                                                       | NC_000068.6    |
| 1.8                | Up                | SLIT and NTRK-like family, member 6                                             | BC145927       |
| 1.8                | Up                | solute carrier family 38, member 4                                              | AY027919       |
| 1.8                | Down              | dehydrogenase/reductase (SDR family) member 3                                   | BC010972       |
| 1.8                | Down              | neurotrophin 3                                                                  | BC065785       |
| 1.8                | Down              | latexin                                                                         | D88769         |
| 1.8                | Down              | RIKEN cDNA 6430550H21 gene                                                      | BC062956       |
| 1.8                | Up                | decorin                                                                         | BC132521       |
| 1.8                | Down              | LIM domain binding 2                                                            | U89489         |
| 1.8                | Down              | MAM domain containing glycosylphosphatidylinositol anchor 2                     | AY371925       |
| 1.8                | Down              | protein tyrosine phosphatase, non-receptor type 3                               | NM_011207.2    |
| 1.8                | Down              | cadherin 7, type 2                                                              | BC083189       |
| 1.8                | Up                | wingless-related MMTV integration site 5A                                       | BC018425       |
| 1.7                | Down              | hemicentin 1                                                                    | NM_001024720.3 |

|            |             |                                                                                     |                            |
|------------|-------------|-------------------------------------------------------------------------------------|----------------------------|
| 1.7        | Down        | CUB and Sushi multiple domains 3                                                    | NM_001081391.2             |
| 1.7        | Down        | visinin-like 1                                                                      | AY101375                   |
| 1.7        | Down        | leucine rich repeat containing 4C                                                   | BC094588                   |
| 1.7        | Down        | cadherin 9                                                                          | NM_009869.1                |
| 1.7        | Down        | MACRO domain containing 2                                                           | NC_000068.6                |
| <b>1.7</b> | <b>Down</b> | <b>Adams3</b>                                                                       | <b>NM_177872.2</b>         |
| 1.7        | Down        | SLIT and NTRK-like family, member 2                                                 | BC111888                   |
| 1.7        | Down        | protein phosphatase 1, regulatory (inhibitor) subunit 1C                            | BC120706                   |
| 1.7        | Down        | metallophosphoesterase domain containing 2                                          | BC020182                   |
| 1.7        | Down        | aldehyde dehydrogenase family 1, subfamily A2                                       | BC075704                   |
| 1.7        | Down        | CUB and Sushi multiple domains 3                                                    | NM_001081391.2             |
| 1.7        | Up          | metallothionein 2                                                                   | BC031758                   |
| 1.7        | Down        | tachykinin 1                                                                        | D17584                     |
| <b>1.7</b> | <b>Down</b> | <b>roundabout homolog 2 (Drosophila)</b>                                            | <b>DQ533876</b>            |
| 1.7        | Up          | gene model 784, (NCBI)                                                              | DQ192038 BC076625          |
| 1.6        | Down        | KH domain containing, RNA binding, signal transduction associated 2                 | BC132117                   |
| 1.6        | Up          | meiotic nuclear divisions 1 homolog (S. cerevisiae)                                 | BC027741                   |
| 1.6        | Down        | zinc finger protein 804A                                                            | BC035535                   |
| 1.6        | Up          | RIKEN cDNA 2610301F02 gene                                                          | AK011952.1                 |
| 1.6        | Up          | vitronectin                                                                         | BC012690                   |
| 1.6        | Up          | RIKEN cDNA 3100002J23 gene                                                          | BC117741 BC126964 BC094630 |
| 1.6        | Down        | SLIT and NTRK-like family, member 2                                                 | AK141924                   |
| 1.6        | Down        | neuritin 1                                                                          | BC035531                   |
| 1.6        | Down        | PNMA-like 2                                                                         | NM_001099636.2             |
| 1.6        | Up          | small nucleolar RNA, C/D box 16A                                                    | AF357363                   |
| 1.6        | Down        | solute carrier family 17 (Na-dependent inorganic phosphate cotransporter), member 6 | BC038375                   |
| 1.6        | Up          | versican                                                                            | D16263                     |
| 1.6        | Up          | chemokine (C-X-C motif) ligand 12                                                   | D43804                     |
| 1.6        | Down        | synaptic vesicle glycoprotein 2c                                                    | BC132111 U24700 AK173092   |
| 1.6        | Down        | glutamate receptor, ionotropic, AMPA1 (alpha 1)                                     | BC056397                   |
| 1.6        | Up          | sulfatase 1                                                                         | AY101178                   |
| 1.6        | Up          | myeloblastosis oncogene-like 1                                                      | L35261                     |
| 1.6        | Up          | RIKEN cDNA 1810011O10 gene                                                          | BC016562                   |
| 1.6        | Down        | potassium voltage-gated channel, Shal-related family, member 2                      | AB045326                   |
| 1.6        | Down        | transmembrane protein 108                                                           | BC052085                   |
| 1.6        | Down        | ubiquitin specific peptidase 29                                                     | AF229257                   |
| 1.6        | Up          | dopa decarboxylase                                                                  | AF071068                   |

Genes exhibiting a fold change greater than 1.5 in *Nkx2.9* null mice as compared with WT littermates.
